# Supplementary material
Source: PubMed Central journal article supplement (PMC4282960)
Supplement: NIHMS641857-supplement.pdf [file NIHMS641857-supplement.pdf]

**Appendix 1:** Medicare billing codes used to define type of esophagectomy and the administration of chemotherapy and radiation therapy.

|                                                                                         |                                                                                                                                                                                                                                                                                                                                                                                                                                                                                                       |
|-----------------------------------------------------------------------------------------|-------------------------------------------------------------------------------------------------------------------------------------------------------------------------------------------------------------------------------------------------------------------------------------------------------------------------------------------------------------------------------------------------------------------------------------------------------------------------------------------------------|
| Transhiatal esophagectomy                                                               | Billing codes                                                                                                                                                                                                                                                                                                                                                                                                                                                                                         |
| ICD-9                                                                                   | 42.40 – 42.42                                                                                                                                                                                                                                                                                                                                                                                                                                                                                         |
| HCPCS                                                                                   | 43107                                                                                                                                                                                                                                                                                                                                                                                                                                                                                                 |
| Transthoracic esophagectomy                                                             |                                                                                                                                                                                                                                                                                                                                                                                                                                                                                                       |
| ICD-9                                                                                   | 42.52, 42.5                                                                                                                                                                                                                                                                                                                                                                                                                                                                                           |
| HCPCS                                                                                   | 43112, 43117, 43121, 43122                                                                                                                                                                                                                                                                                                                                                                                                                                                                            |
| Complex reconstruction (colonic or intestinal interposition, microvascular anastomosis) |                                                                                                                                                                                                                                                                                                                                                                                                                                                                                                       |
| ICD-9                                                                                   | 42.43, 42.55, 42.58, 42.62, 42.63, 42.65, 42.68, 43.5, 43.91, 43.99                                                                                                                                                                                                                                                                                                                                                                                                                                   |
| HCPCS                                                                                   | 43108, 43113, 43124                                                                                                                                                                                                                                                                                                                                                                                                                                                                                   |
| Radiation therapy                                                                       | Billing codes                                                                                                                                                                                                                                                                                                                                                                                                                                                                                         |
| ICD-9                                                                                   | V58.0 V66.1 V67.1 92.20 92.21 92.22 92.23 92.24 92.26 92.27 9.28                                                                                                                                                                                                                                                                                                                                                                                                                                      |
| HCPCS                                                                                   | 31643 77300 77301 77305 77310 77315 77321 77326 77327 77328 77331 77332 77333 77334 77336 77370 77380 77381 77399 77401 77402 77403 77404 77406 77407 77408 77409 77411 77412 77413 77414 77416 77417 77418 77419 77420 77425 77427 77430 77431 77432 77470 77499 77520 77522 77523 77525 77750 77761 77762 77763 77781 77782 77783 77784 77799 C1716 C1717 C1718 C1719 C1720 C1790 C1791 C1792 C1793 C1794 C1795 C1796 C1797 C1798 C1799 C1800 C1801 C1802 C1803 C1804 C1805 C1806 C2616 G0126 G0173 |

| Chemotherapy | Billing codes                                                                                                                                                                                                                                                                                                                                                                                                                                                                   |
|--------------|---------------------------------------------------------------------------------------------------------------------------------------------------------------------------------------------------------------------------------------------------------------------------------------------------------------------------------------------------------------------------------------------------------------------------------------------------------------------------------|
| ICD-9        | V58.1 V66.2 V67.2 99.25                                                                                                                                                                                                                                                                                                                                                                                                                                                         |
| HCPCS        | 95549 96400 96404 96406 96410 96412 96414 96420 96420<br>96422 96423 96425 96440 96445 96450 96542 96545 C9017<br>J0182 J8510 J8530 J8560 J8610 J899 J9000 J9001 J9010 J9045<br>J9060 J9062 J9070 J9080 J9090 J9091 J9092 J9093 J9094 J9095<br>J9096 J9097 J9170 J9180 J9181 J9182 J9190 J9201 J9206 J9208<br>J9230 J9250 J9260 J9265 J9280 J9290 J9291 J9350 J9360 J9370<br>J9375 J9380 J9390 J9999 Q0083 Q0084 Q0085 Q0125 Q0127<br>Q0128 Q0129 S0178 S0182 S9329 S9330 S9331 |
